# Supplementary material for: Varieties of just transition: Public support in South Africa’s Mpumalanga coal community for different policy options
Source: PLOS journal article supplement (doi:10.1371/journal.pclm.0000205), 2023-05-11
Supplement: S1 (10.1371/journal.pclm.0000205.s001) [file journal.pclm.0000205.s001]

**S1 Text: Semi-Structured Questionnaire**

You are invited to take part in a study conducted by the Centre for Sustainability Transitions at Stellenbosch University in collaboration with University of Washington. You were approached as a possible participant because you have experience and insights that will be invaluable in answering the research question.

Thank you for meeting with us. We want to ask your opinion about climate change and coal mining. As you know, coal-burning creates emissions that cause climate change. Hence, the international community wants countries to stop using coal to generate electricity. They are willing to provide aid to countries to do so.

South Africa has a big coal mining sector, and most of South Africa’s electricity is generated from coal. If coal mining is stopped, then many people will lose jobs and the local economy will suffer. The South African government and non-governmental organizations are exploring how to support people who will lose jobs. We want to understand your perspective on this subject.

This study is being done by researchers from Stellenbosch University and University of Washington. The information you provide will be used solely for academic research and is not funded by any commercial or governmental organization.

Your answers will remain anonymous. The information you provide will not contain your name and will be stored separately from this form. It will be accessible only to researchers in this team and protected with a password. The recording of the interview will be destroyed after the interview is transcribed. There are no known risks posed by participating in this survey. The survey has been reviewed by University of Washington's Human Subject Division (STUDY##). Your participation is voluntary, and you may discontinue participating in the interview at any time.

You can choose whether to be in this study or not. If you agree to take part in this study, you may withdraw at any time without any consequence. The researcher may retain and use data collected prior to participant withdrawal as long as the uses are consistent with the study purpose and ethics application procedure. You may also refuse to answer any questions you don’t want to answer and still remain in the study. The researcher may withdraw you from this study if the research study is concluded for any reason.

If you have any questions or concerns, please contact XXXX, Cell phone number: XXX

We are very grateful for your participation.

**QUESTIONS FOR COAL MINERS**

Background information:

1. Is the worker Male or Female? (This is for the interviewer to note. The information is important for gender disaggregated data analysis)
2. What is your age:
3. Are you originally from Mpumalanga province? If not, which province or country do you come from?
4. Please tell us about how you began working in the coal mines? How long have you been employed or were you employed in this sector? What is / was your position?
5. What do / did you like about working on the coal mines? Is / was it good money? Do people respect coal miners? Would you want your children to work in coal mines as well?

Impacts of coal mining

1. What do you understand about the impact of coal mining on the environmental and human health?
2. Have you heard about climate change? How do you think coal contributes to it?
3. Do you think it is fair that coal mines are being closed to tackle climate change?
4. Are there any health issues you know of that are associated with coal mining?
5. Have you suffered from these health issues?

Coal mine closures and compensation

1. South Africa is planning to close coal mines and power plants. Have you heard talk about it? How do you think it will affect you?
2. If you are not from Mpumalanga, will you return to your area of origin if you lose your job or if the mine were to close down?
3. Some people are talking about policies to help coal miners when mines are closed down. Have your employers or union leaders discussed this issue?
4. People are saying that if mines are closed the government should offer some form of “compensation”. There are many ideas on how this compensation should be paid. Do you have any ideas on how this compensation should be given?

- Would you prefer this to be spread out over a number of years, or as a once off package?
- Do you think instead of compensation, the government should open up new colleges or schools to give you new skills? If so, what kind of skills would be helpful for you?
- What kind of jobs would you like to see replace the mining jobs?
- In your opinion, what is a decent or good job? (prompt conditions, pay package, duration, benefits etc)
- Some say that instead of giving money, governments should create better roads, streets, and provide internet so that new businesses come to your community. This is how new jobs will get created. What is your opinion on this?

1. As an ex-miner, did you receive compensation? Was it from your employer or government? Was it money or other kind? Please explain if you received another form of compensation.
2. For ex-miners: What did you do with your compensation package?
3. For miners: What will you do with your compensation package?
4. As part of ‘fixing’ the Climate Change problem, governments are supposed to get money from international donors. Do you think the South African government will spend the money fairly? What do you think they should spend the money on? Do you think mining companies should get this money? Or the unions?
5. If the mines close, will you continue to live in this area? Where would you go? Remain in the same province, move to another province, move to another country?

**QUESTIONS FOR OTHER COMMUNITY MEMBERS**

Background information:

1. Is the respondent Male or Female? (This is for the interviewer to note. The information is important for gender disaggregated data analysis)
2. Are you originally from Mpumalanga province? If not, which province or country do you come from?
3. How long have you been living in this area (in Mpumalanga)?
4. What do you like about living in this area?

Impacts of coal mining

1. What are the advantages and disadvantages of coal mining in this area? Examples include: employment opportunities, mining skills, polluted air and water, etc.
2. How do you personally benefit from coal mining or living in an area with coal mining activities?
3. Have you heard about climate change? How do you think coal contributes to it?
4. Do you think it is fair that coal mines are being closed to tackle climate change?
5. Are there any health issues you know of that are associated with coal mining?

Community compensation

1. South Africa is planning to close coal mines and power plants. Have you heard talk about it? How do you think it will affect you and your community?
2. People are saying that if mines are closed the government should offer you some form of “compensation”. There are many ideas on how this compensation should be paid. Do you have any ideas on how this compensation should be given to the community?

- For community and infrastructure development projects? Which ones?
- For development of skills that that will benefit everyone, not only mine workers?
- What kind of skills would be helpful for you?
- What kind of jobs would you like to see replace the mining jobs?
- In your opinion, what is a decent or good job? (prompt conditions, pay package, duration, benefits etc)
- Some say that instead of giving money, governments should create better roads, streets, and provide internet so that new businesses come to your community. This is how new jobs will get created. What is your opinion on this?
